# Supplementary material
Source: PubMed Central journal article supplement (PMC8065240)
Supplement: bloodBLD2020009217-suppl1.pdf [file bloodBLD2020009217-suppl1.pdf]

## **Supplementary information**

### **Methods: Bleed and target joint definitions**

A treated bleed were those directly followed by administration of a coagulation product, reported to be a “treatment for bleed,” without an intervening bleed and irrespective of the time between the treatment and the preceding bleed. A bleed and the first treatment thereafter were connected as a pair (i.e., one treatment belonged to one bleed only), with the following exception: if multiple bleeds occurred on the same calendar day, the subsequent treatment was considered to apply for each of these multiple bleeds (which were, however, counted as separate bleeds). Bleeds due to surgeries/procedures were not included in the primary analysis. Only treatments that were recorded as “treatment for bleed” were included in analyses of treated bleeds.

All bleeds included all that were recorded, regardless of management with coagulation product.

Target joints were defined as major joints (e.g. hip, elbow, wrist, shoulder, knee, ankle) with three or more bleeds during a 24-week period.<sup>16</sup> Presence or absence of target joints was recorded for each patient according to bleeding events occurring during the 24 weeks that preceded study enrolment. Target joint resolution was defined as  $\leq 2$  spontaneous or traumatic bleeding events during any continuous 52-week period of emicizumab treatment. To be included in the target joint analysis, participants had to have  $\geq 1$  target joint at baseline and  $\geq 52$  weeks of emicizumab treatment (including up-titration, if applicable).

Supplementary table 1. Reported emicizumab efficacy at primary analysis of the HAVEN 1–4 studies<sup>8-11</sup>

|                                              | HAVEN 1<br>NCT02622321 |                      |                     | HAVEN 2<br>NCT02795767 |                     |                    | HAVEN 3<br>NCT02847637 |                    |                     |                     | HAVEN 4<br>NCT03020160 |                     |
|----------------------------------------------|------------------------|----------------------|---------------------|------------------------|---------------------|--------------------|------------------------|--------------------|---------------------|---------------------|------------------------|---------------------|
|                                              | Arm A<br>n = 35        | Arm B<br>n = 18      | Arm C<br>n = 49     | Arm A<br>n = 68        | Arm B<br>n = 10     | Arm C<br>n = 10    | Arm A<br>n = 36        | Arm B<br>n = 35    | Arm C<br>n = 18     | Arm D<br>n = 63     | PK run-in<br>n = 7     | Expansion<br>n = 41 |
| <b>Participant demographics</b>              |                        |                      |                     |                        |                     |                    |                        |                    |                     |                     |                        |                     |
| Prior treatment regimen                      | Ex                     | Ex                   | Px                  | Ex or Px               | Ex or Px            | Ex or Px           | Ex                     | Ex                 | Ex                  | Px                  | Ex                     | Ex or Px            |
| FVIII inhibitor status                       | +                      | +                    | +                   | +                      | +                   | +                  | -                      | -                  | -                   | -                   | + or -                 | + or -              |
| Age, median (range)                          | 38.0<br>(12–68)        | 35.5<br>(13–65)      | 17.0<br>(12–75)     | 6.0<br>(1–15)          | 8.0<br>(2–10)       | 9.0<br>(2–11)      | 36.5<br>(19–77)        | 41.0<br>(20–65)    | 40.0<br>(16–57)     | 36.0<br>(13–68)     | 37.0<br>(14–50)        | 39.0<br>(14–68)     |
| <b>Median (range) efficacy period, weeks</b> | 29.29<br>(0.1–48.9)    | 24.14<br>(23.0–26.0) | 19.14<br>(6.9–45.3) | 57.6<br>(17.9–92.6)    | 21.3<br>(18.6–24.1) | 19.9<br>(8.9–24.1) | 29.6<br>(17.3–49.6)    | 31.3<br>(7.3–50.6) | 24.0<br>(14.4–25.0) | 33.1<br>(18.4–48.6) | 43.7<br>(41.7–45.7)    | 25.6<br>(24.1–29.4) |
| <b>Emicizumab dosing regimen</b>             | 1.5 mg/kg QW           | NA                   | 1.5 mg/kg QW        | 1.5 mg/kg QW           | 3.0 mg/kg Q2W       | 6.0 mg/kg Q4W      | 1.5 mg/kg QW           | 3.0 mg/kg Q2W      | NA                  | 1.5 mg/kg QW        | 6.0 mg/kg Q4W          | 6.0 mg/kg Q4W       |
| <b>Select efficacy endpoints</b>             |                        |                      |                     |                        |                     |                    |                        |                    |                     |                     |                        |                     |

|                                            |                    |                       |                     |                    |                    |                    |                  |                  |                     |                  |                  |                  |
|--------------------------------------------|--------------------|-----------------------|---------------------|--------------------|--------------------|--------------------|------------------|------------------|---------------------|------------------|------------------|------------------|
| Model-based ABR (95% CI)                   | 2.9<br>(1.69–5.02) | 23.3<br>(12.33–43.89) | 5.1<br>(2.28–11.22) | 0.3<br>(0.17–0.50) | 0.2<br>(0.03–1.72) | 2.2<br>(0.69–6.81) | 1.5<br>(0.9–2.5) | 1.3<br>(0.8–2.3) | 38.2<br>(22.9–63.8) | 1.6<br>(1.1–2.4) | 0.6<br>(0.5–2.5) | 2.4<br>(1.4–4.3) |
| % reduction versus control arm             | 87                 | –                     | NA                  | NA                 | NA                 | NA                 | 96               | 97               | NA                  | 68*              | NA               | NA               |
| % of participants with zero treated bleeds | 62.9               | 5.6                   | 69.4                | 76.9               | 90.0               | 60.0               | 56.0             | 60.0             | 0                   | 55.6             | 71.4             | 56.1             |
| <b>Safety endpoints</b>                    |                    |                       |                     |                    |                    |                    |                  |                  |                     |                  |                  |                  |
| TEs                                        | 2                  |                       |                     | 0                  |                    |                    | 0                |                  |                     | 0                |                  |                  |
| TMA                                        | 3                  |                       |                     | 0                  |                    |                    | 0                |                  |                     | 0                |                  |                  |
| Fatalities                                 | 1                  |                       |                     | 0                  |                    |                    | 0                |                  |                     | 0                |                  |                  |

\*In this case, the control arm was the equivalent cohort in the previous non-interventional study (NCT02476942), rather than the no prophylaxis arm.

ABR, annualized bleeding rate; BPA, bypassing agent, CI, confidence interval; Ex, episodic; NE, not evaluated; NR, not reported; Px, prophylactic; QW, once weekly; Q2W, every 2 weeks; Q4W, every 4 weeks; TE, thrombotic event; TMA, thrombotic microangiopathy.

**Supplementary table 2. Participants exposed to emicizumab during the entirety of each time interval and thereby included in the efficacy analyses across time**

| <b>Period (weeks)</b> | <b>Pooled analysis, n</b> | <b>HAVEN 1, n</b> | <b>HAVEN 2, n</b> | <b>HAVEN 3, n</b> | <b>HAVEN 4, n</b> |
|-----------------------|---------------------------|-------------------|-------------------|-------------------|-------------------|
| 1–24                  | 391                       | 109               | 86                | 148               | 48                |
| 25–48                 | 374                       | 101               | 84                | 144               | 45                |
| 49–72                 | 343                       | 98                | 62                | 140               | 43                |
| 73–96                 | 283                       | 79                | 42                | 131               | 31                |
| 97–120                | 207                       | 50                | 26                | 104               | 27                |
| 121–144               | 170                       | 37                | 17                | 89                | 27                |
| 145–168               | 79                        | 28                | 0                 | 48                | 3                 |
| 169–192               | 19                        | 19                | 0                 | 0                 | 0                 |

**Supplementary table 3. Most common adverse events (reported in ≥5% of participants) over a median (range) exposure of 130.3 (3.4–221.1) weeks**

| <b>Adverse event, n (%)</b>       | <b>TOTAL<br/>(N = 399)</b> |
|-----------------------------------|----------------------------|
| Nasopharyngitis                   | 126 (31.6)                 |
| Injection site reaction           | 111 (27.8)                 |
| Arthralgia                        | 103 (25.8)                 |
| Headache                          | 83 (20.8)                  |
| Upper respiratory tract infection | 79 (19.8)                  |
| Pyrexia                           | 61 (15.3)                  |
| Influenza                         | 47 (11.8)                  |
| Cough                             | 46 (11.5)                  |
| Diarrhea                          | 45 (11.3)                  |
| Fall                              | 31 (7.8)                   |
| Back pain                         | 30 (7.5)                   |
| Contusion                         | 30 (7.5)                   |
| Pain in extremity                 | 30 (7.5)                   |
| Ligament sprain                   | 27 (6.8)                   |
| Vomiting                          | 27 (6.8)                   |
| Rash                              | 24 (6.0)                   |
| Nausea                            | 23 (5.8)                   |
| Toothache                         | 23 (5.8)                   |
| Bronchitis                        | 22 (5.5)                   |

|                |          |
|----------------|----------|
| Limb injury    | 22 (5.5) |
| Abdominal pain | 20 (5.0) |
| Dental caries  | 20 (5.0) |
| Myalgia        | 20 (5.0) |

Multiple occurrences of the same adverse event in a participant were counted only once.

Adverse events are MedDRA (version 23.0); injection site reactions were reported using an electronic case report form-specific tick-box; all other adverse events are preferred terms.

Supplementary figure 1. Mean (95% CI) emicizumab trough concentration over time

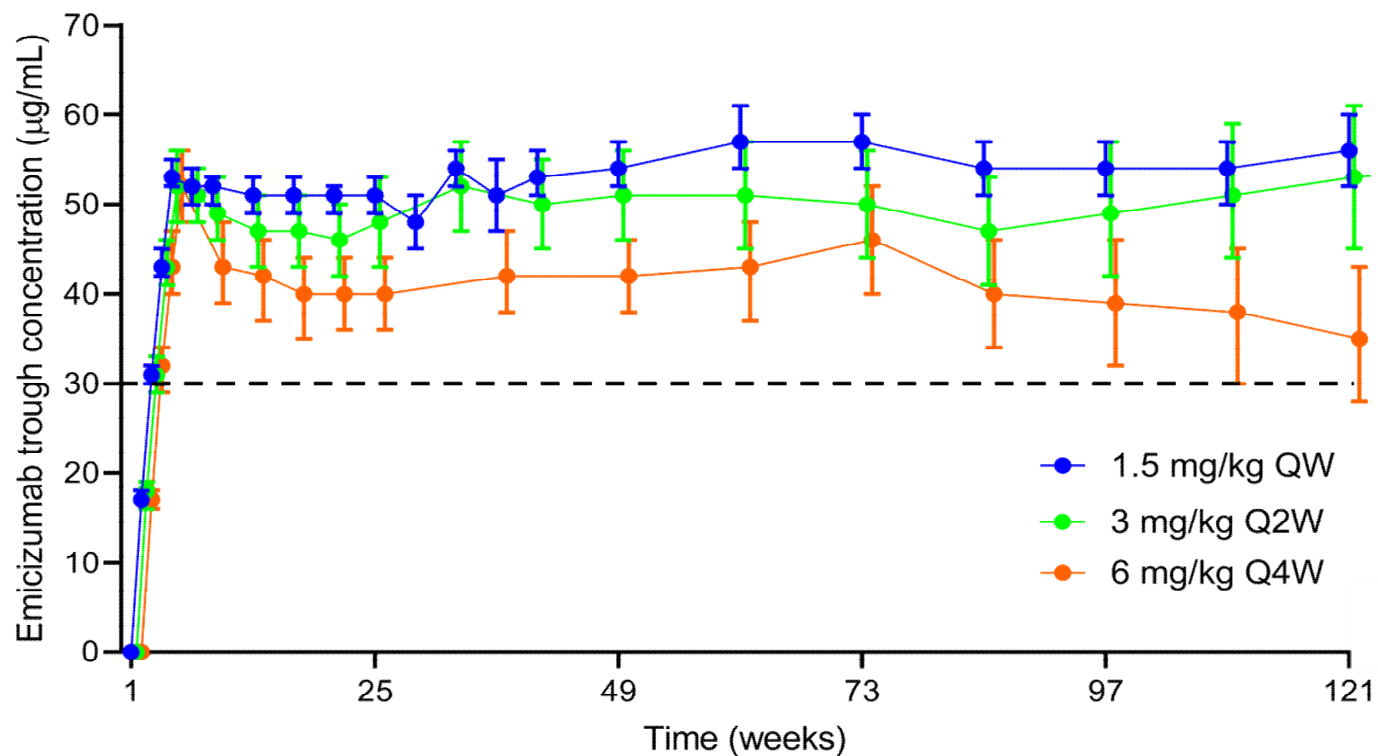

\*Data shown for timepoints when sample size n was  $\geq 30\%$  of total sample size N in a given dosing regimen group.

The dashed line indicates the target efficacious exposure of  $>30$  µg/mL.

CI, confidence interval; QW, once weekly; Q2W, every 2 weeks; Q4W, every 4 weeks.
